# Supplementary material for: The 'Women's Lifestyle Study', 2-year randomized controlled trial of physical activity counselling in primary health care: rationale and study design
Source: PubMed Central journal article supplement (PMC1971069; doi:10.1186/1471-2458-7-166), 2007-07-23
Supplement: 1471-2458-7-166-S1.pdf [file 1471-2458-7-166-S1.pdf]

CONSORT Checklist of items to include when reporting a randomized trial

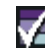

| PAPER SECTION<br>And topic                 | Item | Description                                                                                                                                                                                                                                                                                                                                                 | Reported<br>on<br>Page # |
|--------------------------------------------|------|-------------------------------------------------------------------------------------------------------------------------------------------------------------------------------------------------------------------------------------------------------------------------------------------------------------------------------------------------------------|--------------------------|
| <i>TITLE &amp; ABSTRACT</i>                | 1    | <u>How participants were allocated to interventions</u> (e.g., "random allocation", "randomized", or "randomly assigned").                                                                                                                                                                                                                                  | 1,2                      |
| <i>INTRODUCTION</i><br>Background          | 2    | <u>Scientific background and explanation of rationale.</u>                                                                                                                                                                                                                                                                                                  | 3-4                      |
| <i>METHODS</i><br>Participants             | 3    | <u>Eligibility criteria for participants</u> and the <u>settings and locations where the data were collected.</u>                                                                                                                                                                                                                                           | 5, 6                     |
| Interventions                              | 4    | <u>Precise details of the interventions intended for each group and how and when they were actually administered.</u>                                                                                                                                                                                                                                       | 6, 7                     |
| Objectives                                 | 5    | <u>Specific objectives and hypotheses.</u>                                                                                                                                                                                                                                                                                                                  | 7                        |
| Outcomes                                   | 6    | <u>Clearly defined primary and secondary outcome measures</u> and, when applicable, any <u>methods used to enhance the quality of measurements</u> (e.g., multiple observations, training of assessors).                                                                                                                                                    | 7, 8                     |
| Sample size                                | 7    | <u>How sample size was determined</u> and, when applicable, <u>explanation of any interim analyses and stopping rules.</u>                                                                                                                                                                                                                                  | 8                        |
| Randomization --<br>Sequence generation    | 8    | <u>Method used to generate the random allocation sequence, including details of any restrictions</u> (e.g., blocking, stratification)                                                                                                                                                                                                                       | 7                        |
| Randomization --<br>Allocation concealment | 9    | <u>Method used to implement the random allocation sequence</u> (e.g., numbered containers or central telephone), clarifying whether the sequence was concealed until interventions were assigned.                                                                                                                                                           | 6                        |
| Randomization --<br>Implementation         | 10   | <u>Who generated the allocation sequence, who enrolled participants, and who assigned participants to their groups.</u>                                                                                                                                                                                                                                     | 6                        |
| Blinding (masking)                         | 11   | <u>Whether or not participants, those administering the interventions, and those assessing the outcomes were blinded to group assignment.</u> When relevant, <u>how the success of blinding was evaluated.</u>                                                                                                                                              | 7                        |
| Statistical methods                        | 12   | <u>Statistical methods used to compare groups for primary outcome(s); Methods for additional analyses,</u> such as subgroup analyses and adjusted analyses.                                                                                                                                                                                                 | 8                        |
| <i>RESULTS</i><br>Participant flow         | 13   | <u>Flow of participants through each stage</u> (a diagram is strongly recommended). Specifically, for each group report the numbers of participants randomly assigned, receiving intended treatment, completing the study protocol, and analyzed for the primary outcome. <u>Describe protocol deviations from study as planned, together with reasons.</u> | Fig 1                    |
| Recruitment                                | 14   | <u>Dates defining the periods of recruitment and follow-up.</u>                                                                                                                                                                                                                                                                                             | 5, Fig 1                 |
| Baseline data                              | 15   | <u>Baseline demographic and clinical characteristics of each group.</u>                                                                                                                                                                                                                                                                                     | n/a                      |
| Numbers analyzed                           | 16   | <u>Number of participants (denominator) in each group included in each analysis and whether the analysis was by "intention-to-treat".</u> State the results in absolute numbers when feasible (e.g., 10/20, not 50%).                                                                                                                                       | Fig 1                    |
| Outcomes and estimation                    | 17   | <u>For each primary and secondary outcome, a summary of results for each group, and the estimated effect size and its precision</u> (e.g., 95% confidence interval).                                                                                                                                                                                        | n/a                      |
| Ancillary analyses                         | 18   | <u>Address multiplicity by reporting any other analyses performed,</u> including subgroup analyses and adjusted analyses, indicating those pre-specified and those exploratory.                                                                                                                                                                             | n/a                      |
| Adverse events                             | 19   | <u>All important adverse events or side effects in each intervention group.</u>                                                                                                                                                                                                                                                                             | n/a                      |
| <i>DISCUSSION</i><br>Interpretation        | 20   | <u>Interpretation of the results,</u> taking into account study hypotheses, sources of potential bias or imprecision and the dangers associated with multiplicity of analyses and outcomes.                                                                                                                                                                 | n/a                      |
| Generalizability                           | 21   | <u>Generalizability (external validity) of the trial findings.</u>                                                                                                                                                                                                                                                                                          | n/a                      |
| Overall evidence                           | 22   | <u>General interpretation of the results in the context of current evidence.</u>                                                                                                                                                                                                                                                                            | n/a                      |
